# Supplementary material for: Surface ligand mediated growth of CuPt nanorods
Source: Royal Society of Chemistry journal article supplement (doi:10.1039/c3ce41524d), 2013-12-05
Supplement: c3ce41524d.pdf [file c3ce41524d.pdf]

## Electronic Supplementary Information

### Surface Ligand Mediated Growth of CuPt Nanorods

Fengjiao Yu, Xiaoxiang Xu, Christopher J. Baddeley, Ronan M. Bellabarba, Pascal Lignier, Robert P. Tooze, John S. T. Irvine and Wuzong Zhou

**Table S1** Experiment conditions of the synthesis of CuPt nanorods. T: reaction time; Amine: hexadecylamine; Acid: hexadecanoic acid; L: Dimension of nanoparticles, length of nanorods or diameter of nanospheres; C8: octylamine and octanoic acid; C12: dodecylamine and dodecanoic acid; C18: octadecylamine and stearic acid.

| Sample<br>Amine:acid          | T (h) | Amine<br>(mmol) | Acid<br>(mmol) | Molar ratio<br>Metal:Amine: Acid | L (nm)                       |
|-------------------------------|-------|-----------------|----------------|----------------------------------|------------------------------|
| 1 : 1                         | 0.5   | 1.8             | 1.8            | 1 : 9 : 9                        | 15.7 (rods)<br>2.8 (spheres) |
| 1 : 1.5                       | 0.5   | 1.8             | 2.7            | 1 : 9 : 13.5                     | 11.7 (rods)                  |
| 1.5 : 1                       | 0.5   | 2.7             | 1.8            | 1 : 13.5 : 9                     | 24.3 (rods)                  |
| 1.5 : 1.5                     | 0.5   | 2.7             | 2.7            | 1 : 13.5 : 13.5                  | 24.0 (rods)                  |
| 0.5 : 0.5                     | 0.5   | 0.9             | 0.9            | 1 : 4.5 : 4.5                    | 2.0 (spheres)                |
| 2 : 1                         | 0.5   | 3.6             | 1.8            | 1 : 18 : 9                       | 28.9 (rods)                  |
| 1 : 1<br>(2-step)             | 0.5   | 1.8             | 1.8            | 1 : 9 : 9                        | Strands of nanowires         |
| 1.5 : 1<br>(2-step)           | 2     | 2.7             | 1.8            | 1 : 13.5 : 9                     | Strands of nanowires         |
| 1.5: 1.5<br>(2 step)          | 0.5   | 2.7             | 2.7            | 1 : 13.5 : 13.5                  | nanorods                     |
| 2 : 1<br>at 160°C<br>(2-step) | 2     | 3.6             | 1.8            | 1 : 18 : 9                       | nanospheres                  |
| Double<br>decanediol          | 0.5   | 1.8             | 1.8            | 1 : 9 : 9                        | 15.6 (rods)                  |
| 1 : 1 C8                      | 0.5   | 1.8             | 1.8            | 1 : 9 : 9                        | 9.5 (rods)                   |
| 1 : 1 C12                     | 0.5   | 1.8             | 1.8            | 1 : 9 : 9                        | 11.4 (rods)                  |
| 1 : 1 C18                     | 0.5   | 1.8             | 1.8            | 1 : 9 : 9                        | 15.2 (rods)                  |

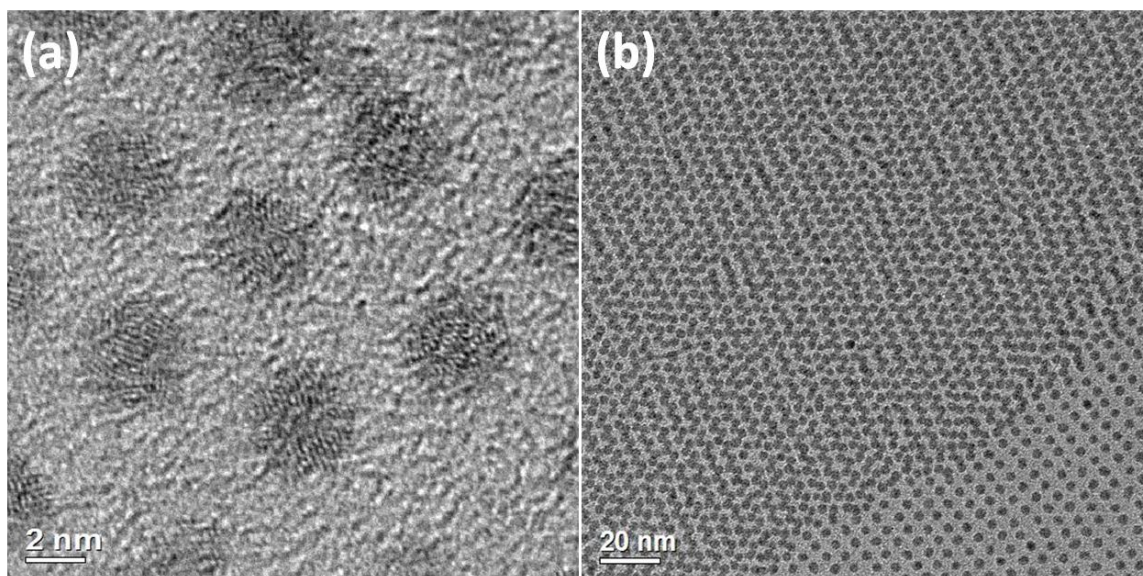

**Figure S1.** (a) HRTEM image of nanospheres from 1 : 1 sample, reaction time is 3 h. (b) TEM image of nanospheres at a low magnification and the self-assembly of nanospheres into one layer (right bottom corner) and two layers.

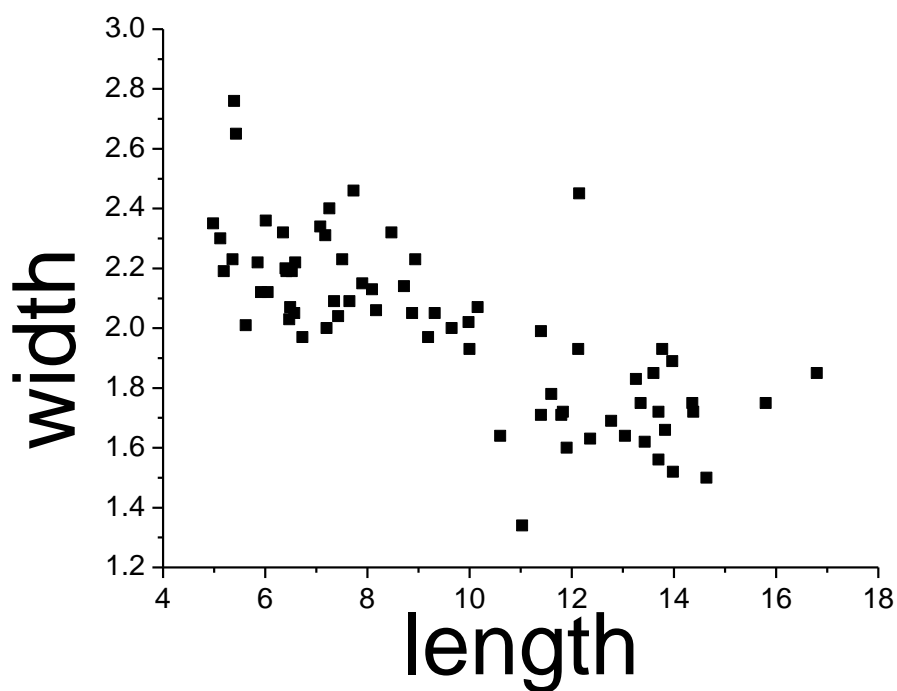

**Figure S2.** Plot of width versus length of the nanorods in the 25 min sample with 1:1 amine and acid.



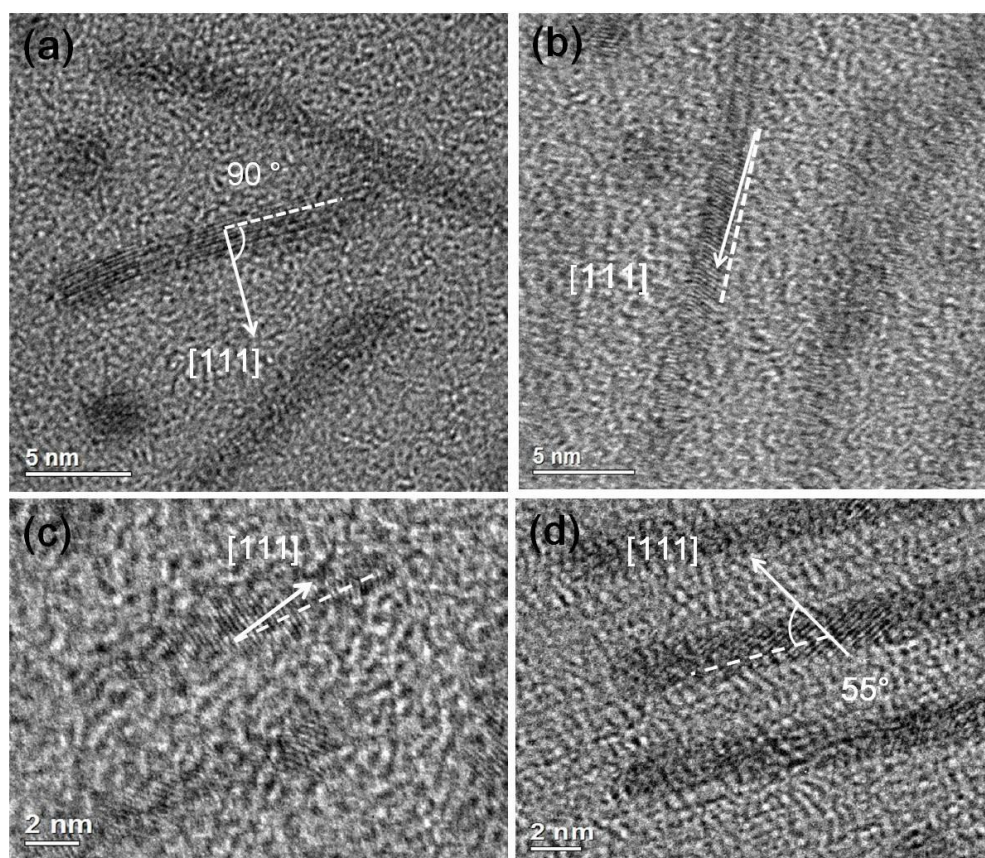

**Figure S3.** HRTEM images of nanorods with various growth directions. Growth directions and [111] directions are marked by dash lines and arrows respectively.

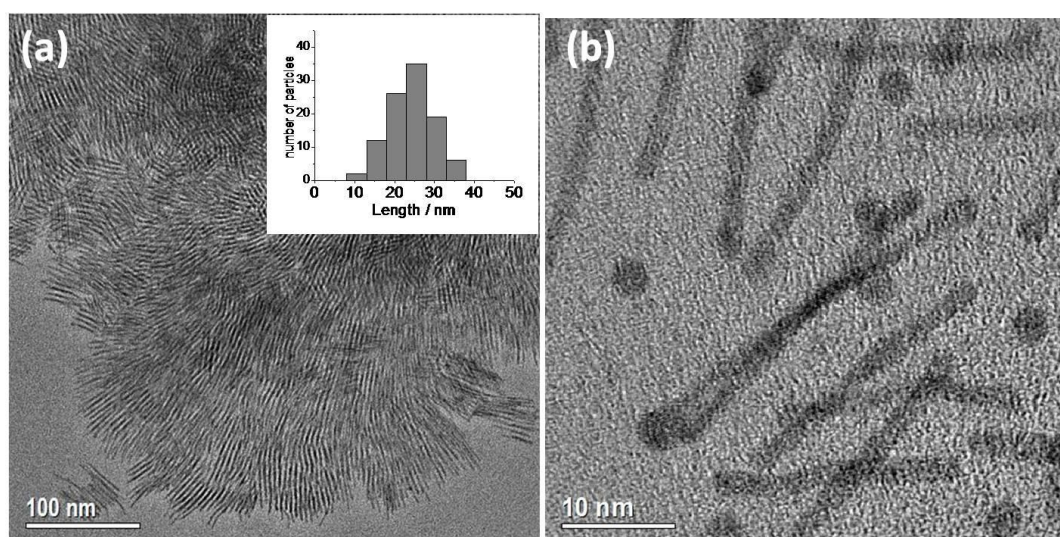

**Figure S4.** TEM images of nanorods synthesized with 1.5 times amount of hexadecylamine (a) large area of nanorod assembly. Inset is the corresponding length histogram. (b) Individual nanorods.

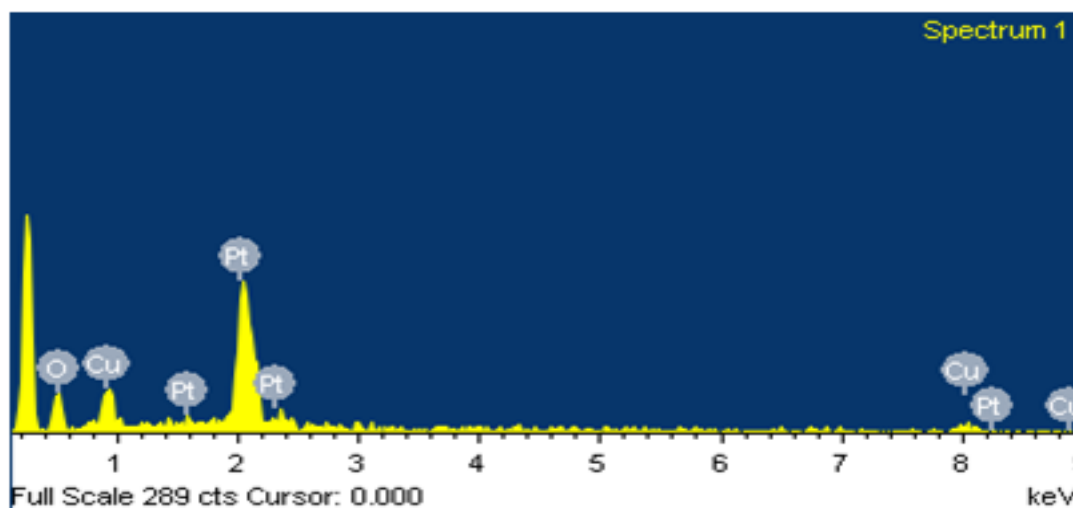

**Figure S5.** EDX result of two-step CuPt nanowires, with a Cu:Pt atomic ratio of 42: 58.

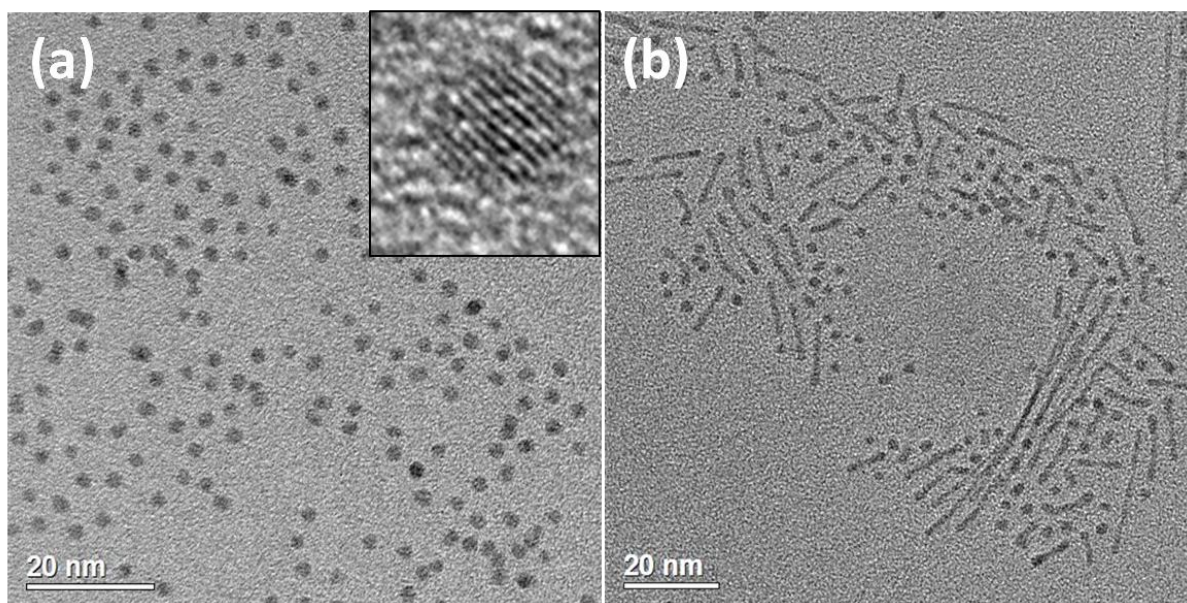

**Figure S6.** TEM images of (a) CuPt nanospheres prepared with amine: acid=0.5: 0.5 in the first step; Inset is HRTEM image of a nanospheres. And (b) adding amine: acid = 1: 1 to the mixture at the second step, elongated nanorods were produced.



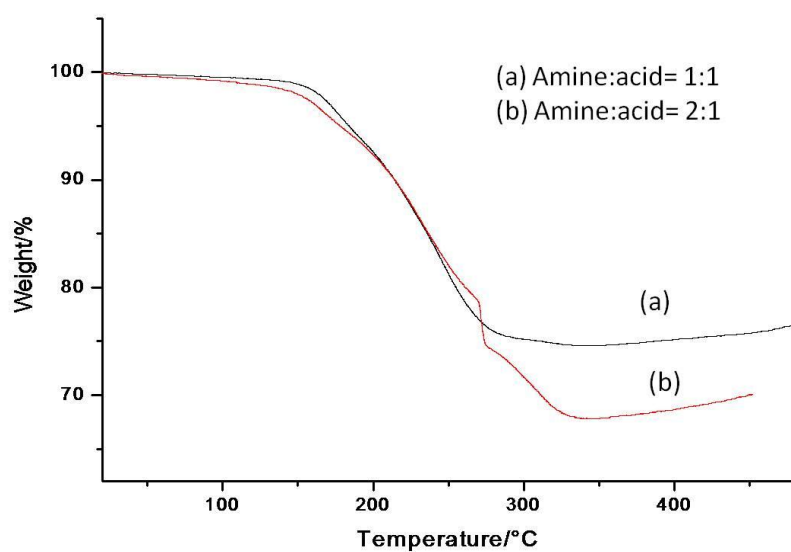

**Figure S7.** TGA result from the (a)1:1 and (b) 2:1 specimen of nanorods.

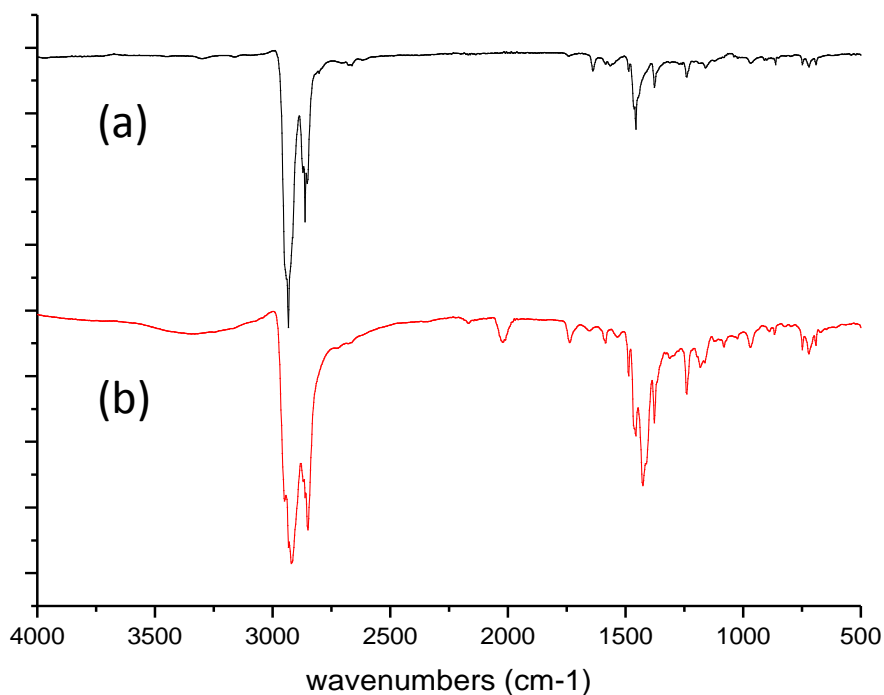

**Figure S8.** IR spectra of CuPt nanorods synthesized with (a) amine: acid = 2:1, (b) amine: acid = 1.5:1. The  $\nu_{\text{sym}}(\text{OCO})$  band at  $\sim 1420\text{ cm}^{-1}$  is observed in spectrum (b), but not in spectrum (a). Instead, the bands observed in spectrum (a) indicate that amine adsorption is dominant under these preparation conditions.

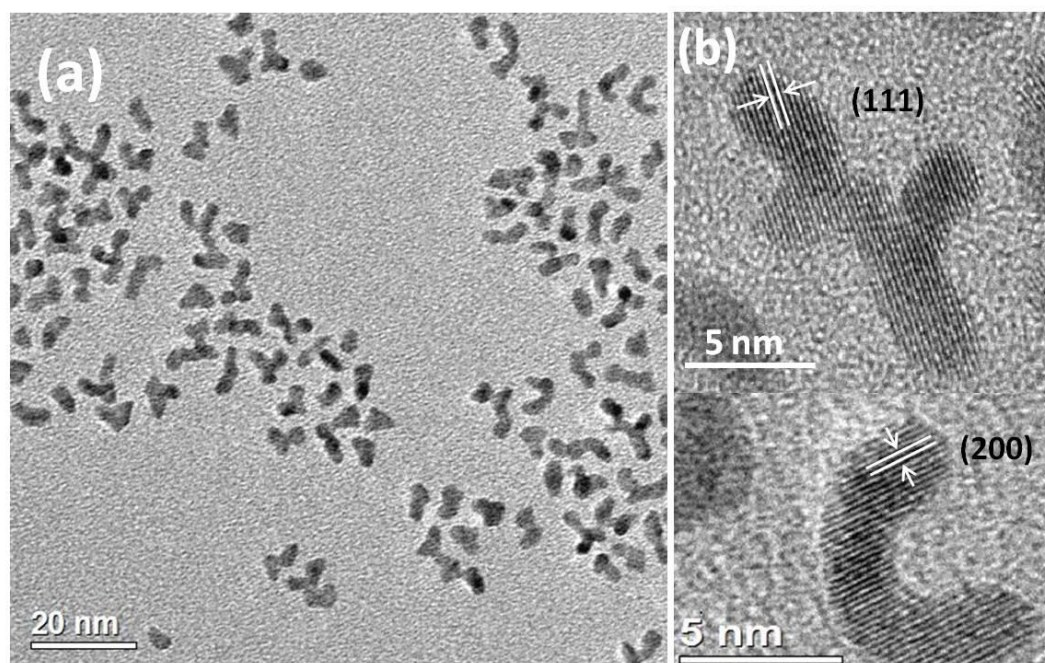

**Figure S9.** (a) TEM and (b) HRTEM images of Pt nanorods prepared under the same condition for photocatalytic test.
